# Supplementary material
Source: publisher site journal article supplement (https://www.spandidos-publications.com/3971/downloadSupplementary)
Supplement: Supplementary file 1 [file downloadSupplementary]

## Sheet: Figure3
	Table SI.	Raw data of bioluminescence imaging of tumor spheroid cells (Fig. 3) and confocal microscopy images of normal brain organoids (Fig. 7) following treatment with the tumor treating fields.
	Group	Cell	Content	Bioluminescence intensity	Average	SD
	100% duty	U87	Control	1840000000	1904000000	8.76356e+07
				2000000000
				1840000000
				2000000000
				1840000000
			TTFields	481000000	469000000	1.64317e+07
				451000000
				481000000
				451000000
				481000000
		U373	Control	1960000000	2584000000	8.54447e+08
				3520000000
				1960000000
				3520000000
				1960000000
			TTFields	404000000	442000000	5.20336e+07
				499000000
				404000000
				499000000
				404000000
	75% duty	U87	Control	5990000000	5672000000	2.90293e+08
				5460000000
				5990000000
				5460000000
				5460000000
			TTFields	584000000	595200000	1.53362e+07
				612000000
				584000000
				612000000
				584000000
		U373	Control	6950000000	5918000000	1.41312e+09
				4370000000
				6950000000
				4370000000
				6950000000
			TTFields	993000000	1067800000	1.02424e+08
				1180000000
				993000000
				1180000000
				993000000
	50% duty	U87	Control	186000000	179600000	8.76356e+06
				170000000
				186000000
				170000000
				186000000
			TTFields	94800000	91320000	4.76519e+06
				86100000
				94800000
				86100000
				94800000
		U373	Control	231000000	194600000	4.98428e+07
				140000000
				231000000
				140000000
				231000000
			TTFields	103000000	111400000	1.15022e+07
				124000000
				103000000
				124000000
				103000000

## Sheet: Figure7
	Table SI. Continued.
	Well	Fluor	Target	Content	Sample	Biological Set Name	Cq		Starting Quantity (SQ)	Log Starting Quantity	SQ Mean	SQ Std. Dev	Set Point	Well Note
	A01	SYBR	18S	cont	8.57398	9.922	8.57398					0	72
	A02	SYBR	18S	cont	8.2803	10.2703	8.2803					0	72
	A03	SYBR	18S	cont	7.57431	10.4605	7.57431					0	72
	A04	SYBR	18S	50 duty	8.16102	10.583	8.16102					0	72
	A05	SYBR	18S	50 duty	7.79158	10.0879	7.79158					0	72
	A06	SYBR	18S	50 duty	8.02268	10.1979	8.02268
	A07	SYBR	18S	75 duty	8.46271	10.1325	8.46271					0	72
	A08	SYBR	18S	75 duty	7.84513	10.2888	7.84513					0	72
	A09	SYBR	18S	75 duty	8.32182	9.63869	8.32182
	A10	SYBR	18S	100 duty	7.63648	10.0787	7.63648
	A11	SYBR	18S	100 duty	8.2263	10.1563	8.2263
	A12	SYBR	18S	100 duty	8.40267	10.3001	8.40267
	B01	SYBR	nestin	cont	24.4695	24.4695	24.4695					0	72
	B02	SYBR	nestin	cont	24.322	24.322	24.322					0	72
	B03	SYBR	nestin	cont	24.3714	24.3714	24.3714					0	72
	B04	SYBR	nestin	50 duty	24.8672	24.8672	24.8672					0	72
	B05	SYBR	nestin	50 duty	24.4828	24.4828	24.4828					0	72
	B06	SYBR	nestin	50 duty	24.6323	24.6323	24.6323					0	72
	B07	SYBR	nestin	75 duty	24.5817	24.5817	24.5817					0	72
	B08	SYBR	nestin	75 duty	24.6982	24.6982	24.6982					0	72
	B09	SYBR	nestin	75 duty	24.5946	24.5946	24.5946					0	72
	B10	SYBR	nestin	100 duty	24.5978	24.5978	24.5978
	B11	SYBR	nestin	100 duty	24.5173	24.5173	24.5173
	B12	SYBR	nestin	100 duty	24.8846	24.8846	24.8846
	C01	SYBR	GFAP	cont	30.4666	31.8508	30.4666					0	72
	C02	SYBR	GFAP	cont	30.7479	31.3663	30.7479					0	72
	C03	SYBR	GFAP	cont	30.9597	31.513	30.9597					0	72
	C04	SYBR	GFAP	50 duty	31.229	31.6003	31.229					0	72
	C05	SYBR	GFAP	50 duty	31.0859	32.3555	31.0859				0	0	72
	C06	SYBR	GFAP	50 duty	31.1107	31.7921	31.1107					0	72
	C07	SYBR	GFAP	75 duty	30.8171	31.0149	30.8171					0	72
	C08	SYBR	GFAP	75 duty	31.5877	30.8868	31.5877					0	72
	C09	SYBR	GFAP	75 duty	31.4009	31.1854	31.4009					0	72
	C10	SYBR	GFAP	100 duty	31.0432	32.1121	31.0432
	C11	SYBR	GFAP	100 duty	30.4171	31.9291	30.4171
	C12	SYBR	GFAP	100 duty	30.3474	31.5927	30.3474					0	72
	D01	SYBR	NeuN	cont	30.5988	39.3599	30.5988					0	72
	D02	SYBR	NeuN	cont	30.4748	38.858	30.4748					0	72
	D03	SYBR	NeuN	cont	30.6989	36.4679	30.6989					0	72
	D04	SYBR	NeuN	50 duty	30.1989	30.1989	30.1989					0	72
	D05	SYBR	NeuN	50 duty	30.3151	37.6814	30.3151					0	72
	D06	SYBR	NeuN	50 duty	30.5083	39.6305	30.5083					0	72
	D07	SYBR	NeuN	75 duty	31.6101	37.1472	31.6101					0	72
	D08	SYBR	NeuN	75 duty	31.0876	36.9373	31.0876					0	72
	D09	SYBR	NeuN	75 duty	31.0511	36.4325	31.0511
	D10	SYBR	NeuN	100 duty	30.607	38.0798	30.607
	D11	SYBR	NeuN	100 duty	30.7381	39.2015	30.7381					0	72
	D12	SYBR	NeuN	100 duty	30.8568	36.4695	30.8568					0	72
	E01	SYBR	TUJ1	cont	19.0236	19.0236	19.0236					0	72
	E02	SYBR	TUJ1	cont	18.8412	18.8412	18.8412					0	72
	E03	SYBR	TUJ1	cont	18.9506	18.9506	18.9506					0	72
	E04	SYBR	TUJ1	50 duty	19.2365	19.2365	19.2365					0	72
	E05	SYBR	TUJ1	50 duty	19.2185	19.2185	19.2185				0	0	72
	E06	SYBR	TUJ1	50 duty	19.0991	19.0991	19.0991					0	72
	E07	SYBR	TUJ1	75 duty	19.0894	19.0894	19.0894					0	72
	E08	SYBR	TUJ1	75 duty	19.1447	19.1447	19.1447
	E09	SYBR	TUJ1	75 duty	19.0694	19.0694	19.0694
	E10	SYBR	TUJ1	100 duty	19.0997	19.0997	19.0997					0	72
	E11	SYBR	TUJ1	100 duty	19.0109	19.0109	19.0109					0	72
	E12	SYBR	TUJ1	100 duty	19.2237	19.2237	19.2237					0	72
	F01											0	72
	F02
	F03
	F04
	F05
	F06
	F07
	F08
	F09
	F10
	F11
	F12
	G01
	G02
	G03
	G04
	G05
	G06
	G07
	G08
	G09
	G10
	G11
	G12
	H01
	H02
	H03
	H04
	H05
	H06
	H07
	H08
	H09
	H10
	H11
	H12
